# Supplementary material for: ZrO2-induced d–d spatial coordination effects of Ru single-atom catalysts to boost the oxygen evolution reaction
Source: Royal Society of Chemistry journal article supplement (doi:10.1039/d6sc01575a), 2026-04-08
Supplement: d6sc01575a1.pdf [file d6sc01575a1.pdf]

## Supporting Information

### **ZrO<sub>2</sub> induced *d–d* spatial coordination effects of Ru single-atom catalysts to boost oxygen evolution reaction**

Dandan Yu,<sup>a</sup> Bin Liu,<sup>a</sup> Dongming Li,<sup>a</sup> Junkai Yu,<sup>a</sup> Xijie Lan,<sup>a</sup> Shuhong Liu,<sup>a</sup> Zhuxin Li,<sup>b</sup>  
Pengyun Gao,<sup>b</sup> Yong Zhang\*<sup>a</sup> and Hong Zhao\*<sup>b</sup>

<sup>a</sup>School of Materials Science and Engineering, Dalian Jiaotong University, Dalian 116028, China.

<sup>b</sup>College of Material Science and Engineering, Sichuan University of Science & Engineering, Zigong 643000, China.

#### **Corresponding authors**

Email: zhangyong0411@126.com

Email: zhaohong@suse.edu.cn

#### **This file contains:**

Experimental section

Figs. S1 to S27

Tables S1-S9

References (1-22)

**Material and Reagent.** chemicals and materials used in this study were obtained from commercial suppliers, and directly used without purification. Zirconyl chloride octahydrate ( $\text{ZrOCl}_2 \cdot 8\text{H}_2\text{O}$ , A.R.), acetate ( $\text{CH}_3\text{COOH}$ , A.R.) and ammonia solution ( $\text{NH}_4\text{OH}$ , A.R.) were purchased from Aladdin. Ruthenium chloride ( $\text{RuCl}_3 \cdot 3\text{H}_2\text{O}$ ), isopropanol and Nafion (5 wt%) were purchased from Macklin.  $\text{RuO}_2$  was purchased from Shandong Keyuan Biochemical Co., Ltd. Nafion 212 membrane was obtained from DuPont Co. Pt/C (60% Pt) was obtained from Johnson Matthey Company. All chemicals were utilized directly without additional purification.

**Preparation of  $\text{ZrO}_2$ .** 2.4 mmol  $\text{ZrOCl}_2 \cdot 8\text{H}_2\text{O}$  and 3 mmol  $\text{CH}_3\text{COOH}$  were dissolved in 10 ml of deionized water as solution A. The solution A and 5%  $\text{NH}_4\text{OH}$  were slowly added dropwise into 40 ml deionized water until the pH reached 10, followed by vigorous stirring for 30 minutes. Subsequently, the product was collected by centrifugation, washed several times with deionized water, and the solution readjusted to pH 10. The mixture was transferred into a 100 ml Teflon-lined autoclave and heated at  $200^\circ\text{C}$  for 12 hours. After cooling to room temperature, black precipitates were obtained. The precipitates were then centrifuged, washed repeatedly with deionized water and ethanol, dried overnight in an oven at  $60^\circ\text{C}$ , and finally collected as  $\text{ZrO}_2$ .

**Preparation of Ru-RSZ.** The synthesis processes of Ru-RSZ were similar to that for  $\text{ZrO}_2$ , in which 2.4 mmol  $\text{ZrOCl}_2 \cdot 8\text{H}_2\text{O}$  was replaced by 1.92 mmol  $\text{ZrOCl}_2 \cdot 8\text{H}_2\text{O}$  and 0.48 mmol  $\text{RuCl}_3 \cdot 3\text{H}_2\text{O}$ .

**Characterizations.** The morphologies of the catalysts were analyzed through scanning electron microscopy (CIQTEK SEM 3000), transmission electron microscopy (TEM, FEI Titan G2),

and high-resolution TEM (HRTEM). The crystal structure was probed by X-ray powder diffraction (XRD, Empyrean PANalytical) and Raman (Horiba LabRAM HR Evolution). The surface composition of the samples was examined utilizing an X-ray photoelectron spectrometer (XPS, Thermo Scientific K-Alpha). The X-ray absorption spectroscopy (XAS) was measured at Shanghai Synchrotron Radiation Facility (BL17B1 beamline). Wavelet transformations were calculated using the WT EXAFS software.

**Electrochemical Measurements.** The electrochemical performances of catalysts were evaluated in a 0.5 M H<sub>2</sub>SO<sub>4</sub> solution at room temperature. A standard three-electrode system was used in all measurements, with graphite rod as the counter electrode, saturated calomel electrode (saturated KCl) as the reference electrode, and platinum electrode clip with carbon paper as the working electrode. The homogeneous catalyst ink was prepared by dispersing 5 mg of samples, 500  $\mu$ L of isopropanol, 500  $\mu$ L of deionized water and 20  $\mu$ L of Nafion solution (Dupont, 5 wt.%) under ultrasonication for 30 min. The catalyst ink was evenly coated onto the carbon paper with a loading of 0.5 mg·cm<sup>-2</sup> and dried in air at room temperature. All potentials were referenced with a reversible hydrogen electrode (RHE) according to the Nernst equation ( $E_{\text{RHE}} = E_{\text{SCE}} + 0.242$  V), where  $E_{\text{RHE}}$  is the potential of RHE,  $E_{\text{SCE}}$  is the potential of the saturated calomel electrode, 0.242 V is the potential difference between the saturated calomel electrode and RHE in 0.5 M H<sub>2</sub>SO<sub>4</sub>, which was calibrated by the CV test before electrocatalysis.

The mass activity ( $j_{\text{mass}}$ ) of the Ru-RSZ and RuO<sub>2</sub> catalysts was determined using the following equation:

$$j_{\text{mass}} = \frac{j_{\text{geo}} \times A_{\text{geo}}}{m_{\text{Ru}}}$$

where  $m_{\text{Ru}}$  is the calculated Ru mass loaded onto carbon paper based on the results of EDS,  $j_{\text{geo}}$  is the geometric current density and  $A_{\text{geo}}$  is the geometric area.

The TOF of the Ru-RSZ and RuO<sub>2</sub> catalysts were calculated using the following equation, with detailed procedures described below:

$$\text{TOF} = \frac{\text{Total O}_2 \text{ turnovers per } A_{\text{geo}}}{\text{Active sites per } A_{\text{geo}}}$$

The total number of O<sub>2</sub> turnovers per  $A_{\text{geo}}$  was calculated from the current density using the following formula:

$$\text{Total O}_2 \text{ turnover per } A_{\text{geo}} = j_{\text{geo}} \times \frac{1 \text{ C} \cdot \text{s}^{-1}}{1,000 \text{ mA}} \times \frac{1 \text{ mol}}{96,485 \text{ C}} \times \frac{1}{4} \times \frac{6.023 \times 10^{23}}{1 \text{ mol O}_2}$$

All Ru atoms were assumed to be active sites. Therefore, the number of active sites per geometric area equals the number of Ru atoms per geometric area, which can be calculated from the total mass of Ru on the electrode and the atomic weight of Ru.<sup>1</sup>

The electrochemical surface area (ECSA) was estimated from the electrochemical double-layer capacitance ( $C_{\text{dl}}$ ), according to the following equation:

$$\text{ECSA} = \frac{C_{\text{dl}}}{C_s}$$

where  $C_{\text{dl}}$  was derived from CVs measured within the non-Faradic potential range at different scan rates. The  $C_s$  is the specific capacitance of the catalysts per unit area under identical electrolyte conditions. A value of 35.0  $\mu\text{F} \cdot \text{cm}^{-2}$  was used for  $C_s$  in this work to estimate the ECSA.<sup>2</sup>

The roughness factor was calculated by dividing ECSA by the geometric area of the electrode, according to the following equation:

$$R_f = \frac{\text{ECSA}}{A_{\text{geo}}}$$

where  $A_{\text{geo}}$  is the geometric area of the working electrode, which was  $1 \text{ cm}^2$  in this study.

The specific current density per ECSA ( $j_{\text{ECSA}}$ ) was estimated using the following equation:

$$j_{\text{ECSA}} = \frac{j_{\text{geo}}}{R_f}$$

where  $j_{\text{geo}}$  is the geometric current density.

**Electrochemical Measurements.** The membrane electrode assembly (MEA) was fabricated via the catalyst-coated membrane method using the commercial Nafion 212 membrane (N212, Dupont) with a geometric area of  $1 \text{ cm}^2$  ( $1 \text{ cm} \times 1 \text{ cm}$ ), employing commercial Pt/C (60 wt%) as the cathode and the synthesized Ru-RSZ as the anode electrocatalyst. The Ru-RSZ electrocatalyst powder was suspended in a mixture of isopropanol, deionized water, and a Nafion (5 wt%) ethanol solution by ultrasonication for 1 h. The mass loadings of Pt/C (40%) were  $0.5 \text{ mg}\cdot\text{cm}^{-2}$  for the cathode, and the mass loadings of the Ru-RSZ powder were  $2 \text{ mg}\cdot\text{cm}^{-2}$  for the anode, corresponding to a Ru mass loading of  $175.7 \mu\text{g}_{\text{Ru}}\cdot\text{cm}^{-2}$ . A porous Pt-plated Ti foam and carbon paper served as anodic and cathodic porous gas diffusion layers (GDLs), respectively. The membrane coated with electrocatalysts and the GDLs were hot-pressed to form the membrane electrode assembly (MEA) under  $150^\circ\text{C}$  and 10 MPa for 5 min. Finally, the PEM electrolysis cell was assembled by sandwiching the MEA between two titanium bipolar plates featuring serpentine flow fields. The PEMWE was maintained at  $80^\circ\text{C}$  with distilled water as reactant under a flow rate of  $20 \text{ mL}\cdot\text{min}^{-1}$ . The polarization curves were collected from 0 to 2.0 V. The polarization curves were collected from 0 to 2.0 V. The stability of the PEMWE

was evaluated by measuring chronopotentiometry at  $1 \text{ A}\cdot\text{cm}^{-2}$  for 100 h.

**Computational Details.** All the calculations were performed within the framework of the density functional theory (DFT) as implemented in the Vienna Ab initio Software Package (VASP 5.4.4) code within the Perdew–Burke–Ernzerhof (PBE) generalized gradient approximation and the projected augmented wave (PAW) method. The gamma-centered k-mesh of  $2\times 2\times 1$  and plane-wave basis sets with cutoff energy of 450 eV were used. All structures were fully optimized until residual force was converged to  $0.02 \text{ eV}/\text{\AA}$ .  $\text{ZrO}_2$  (110) surfaces replaced by Ru atoms and  $\text{RuO}_2$  (110) substituted were constructed to analyze the electron structure and free energy. A vacuum distance of  $15 \text{ \AA}$  was used on the surface to avoid interactions. The Gibbs free energies of adsorption intermediate in AEM pathway were calculated using  $\Delta G = \Delta E + \Delta\text{ZPE} - \Delta\text{TS}$ , where  $\Delta E$  was the binding energy,  $\Delta\text{ZPE}$  was zero-point energy and  $\text{TS}$  was entropy, respectively.

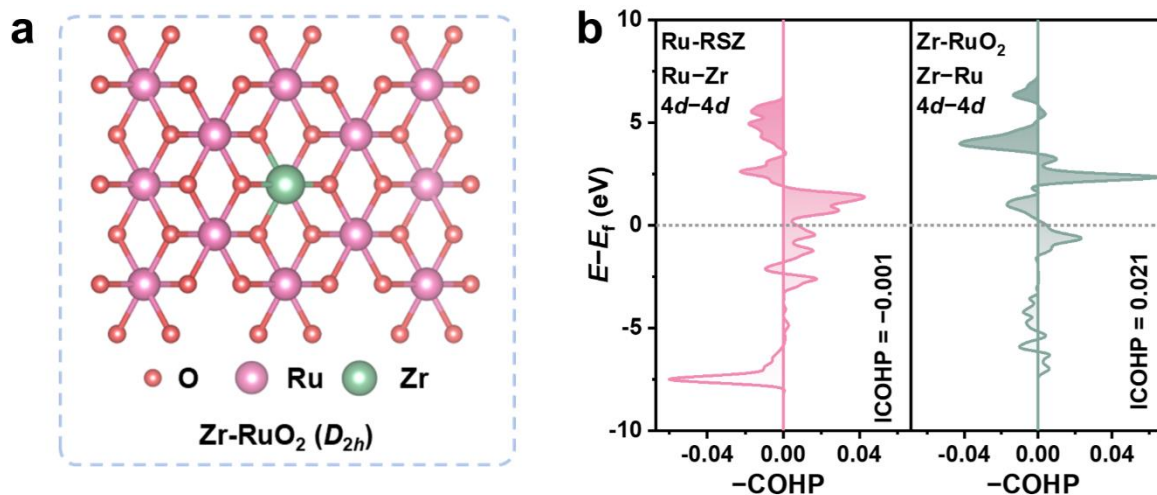

**Fig. S1.** (a) Model of Zr-RuO<sub>2</sub> with  $D_{2h}$  symmetry. (b) Calculated COHP of Ru-RSZ and Zr-RuO<sub>2</sub>. The ICOHP for the Zr-Ru pair in Zr-RuO<sub>2</sub> is +0.021 eV, indicating an antibonding interaction. This contrasts with the weak bonding (-0.001 eV) observed for Ru-Zr in Ru-RSZ ( $D_{2d}$ ), while resembling the antibonding nature of Ru-Ru in RuO<sub>2</sub> (+0.048 eV, Fig. 1b). These results indicate that the  $d-d$  orbital coupling is not solely determined by the spatial proximity of Ru and Zr, but rather depends critically on the  $D_{2d}$  coordination geometry.

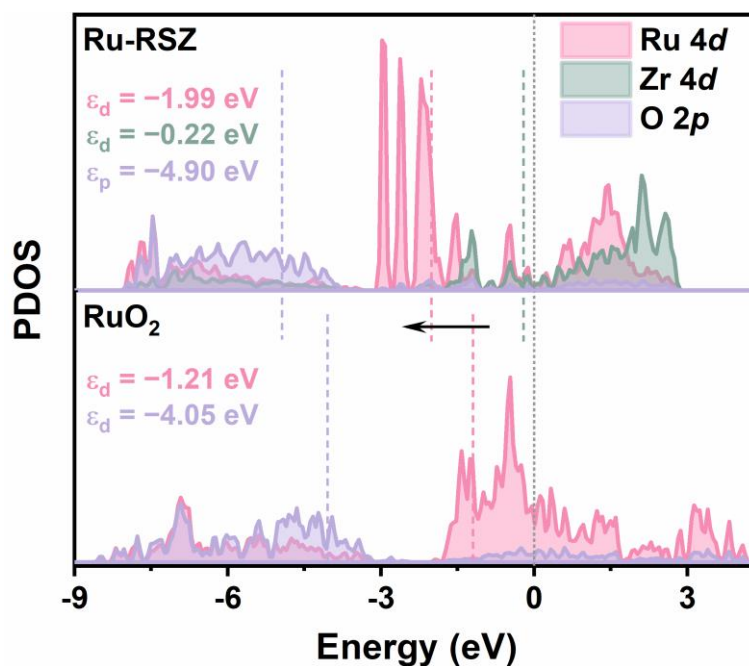

**Fig. S2.** The PDOS of Ru 4d and Zr 4d for Ru-RSZ and RuO<sub>2</sub>.

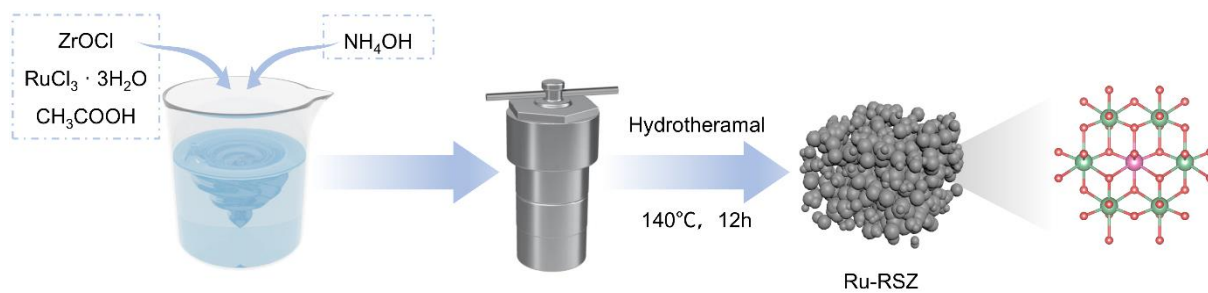

**Fig. S3.** Schematic representation for the synthesis of the catalysts.

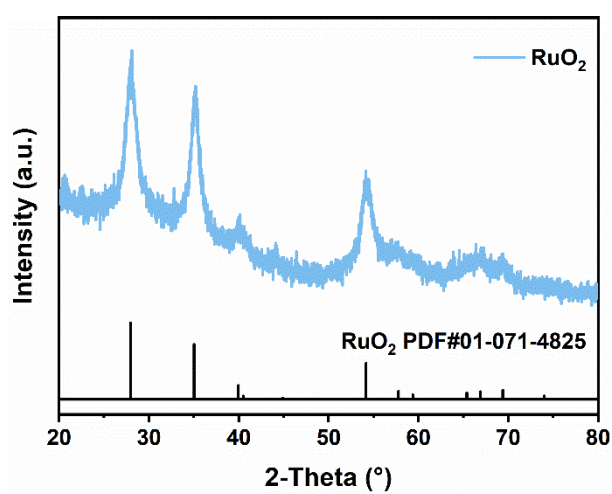

**Fig. S4.** XRD pattern of  $RuO_2$ .

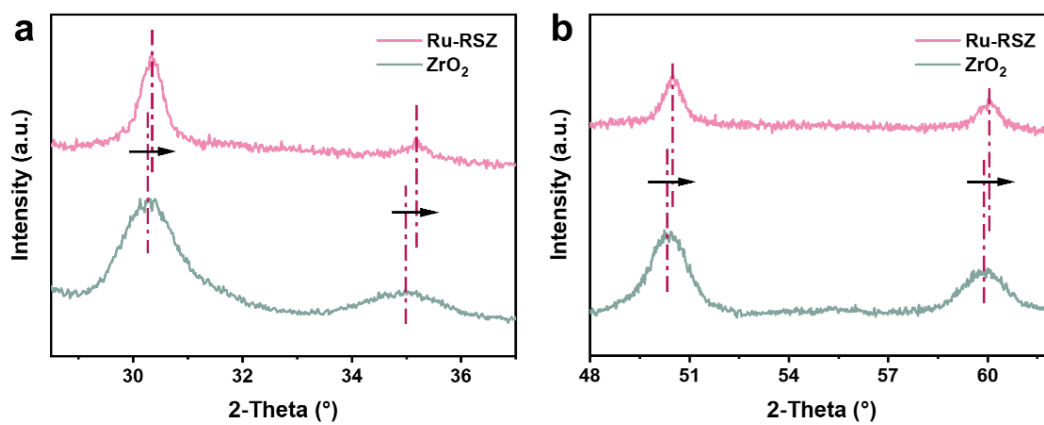

Fig. S5. (a, b) XRD patterns of different crystal planes in Ru-RSZ and ZrO<sub>2</sub>.

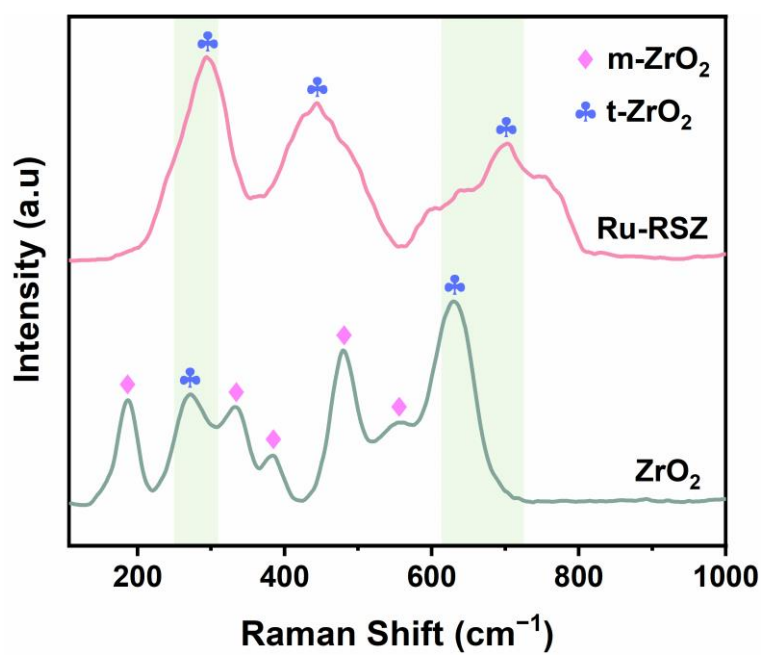

Fig. S6. Raman spectra of Ru-RSZ and ZrO<sub>2</sub>.

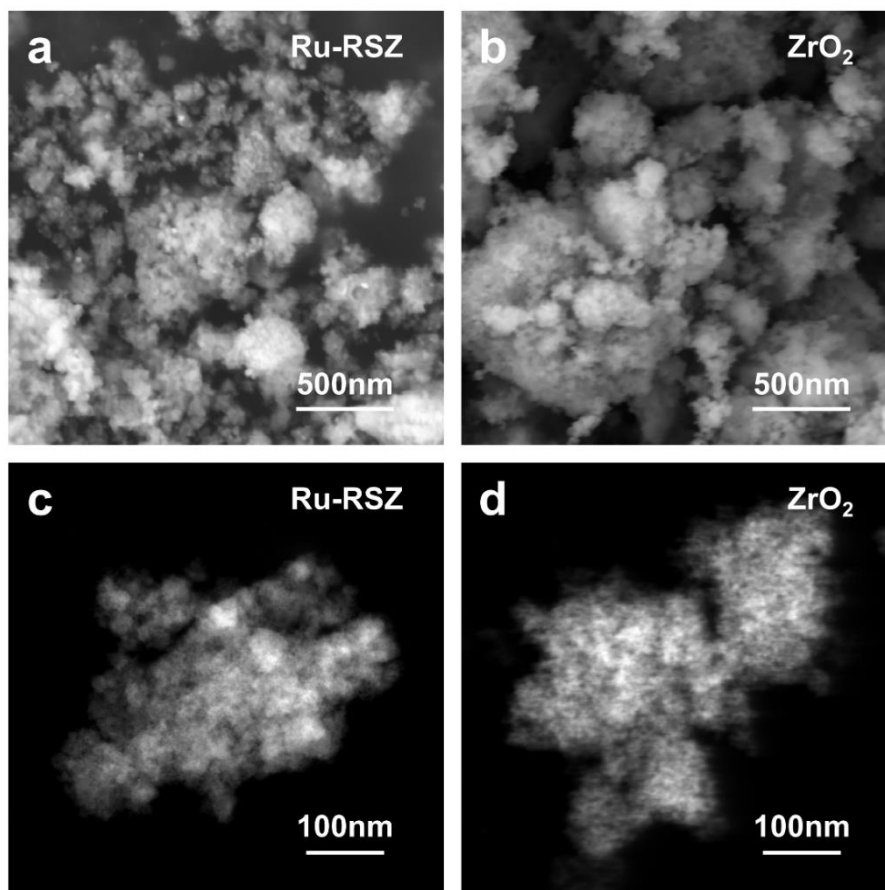

**Fig. S7.** (a, b) SEM images of (a) Ru-RSZ and (b) ZrO<sub>2</sub>. (c, d) STEM images of (c) Ru-RSZ and (d) ZrO<sub>2</sub>.

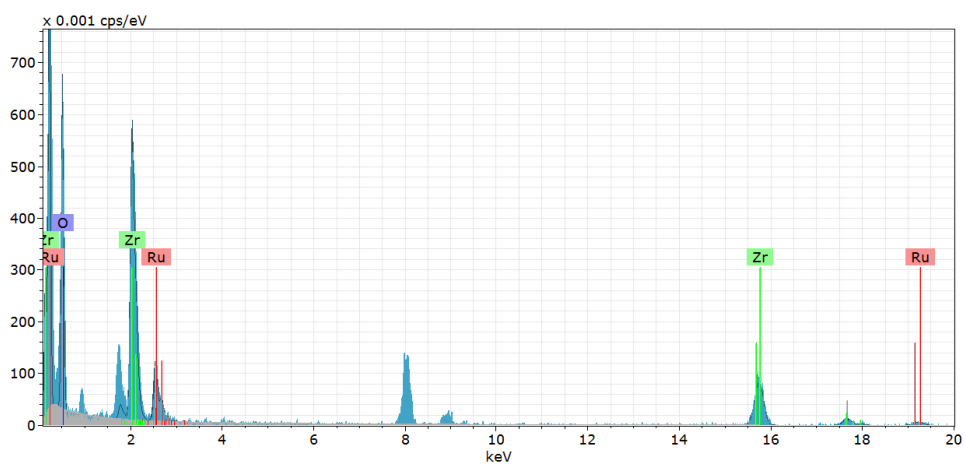

**Fig. S8.** Elemental spectrum of Ru-RSZ.

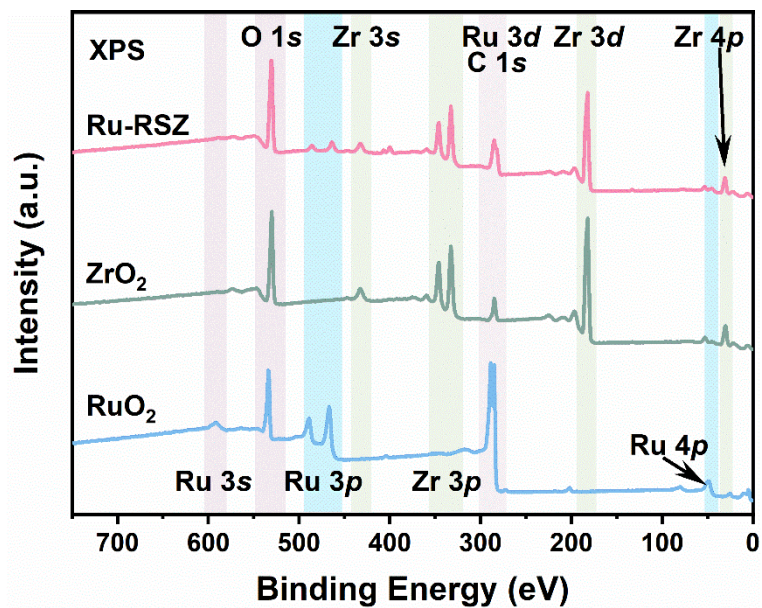

Fig. S9. XPS full spectrum of Ru-RSZ, RuO<sub>2</sub> and ZrO<sub>2</sub>.

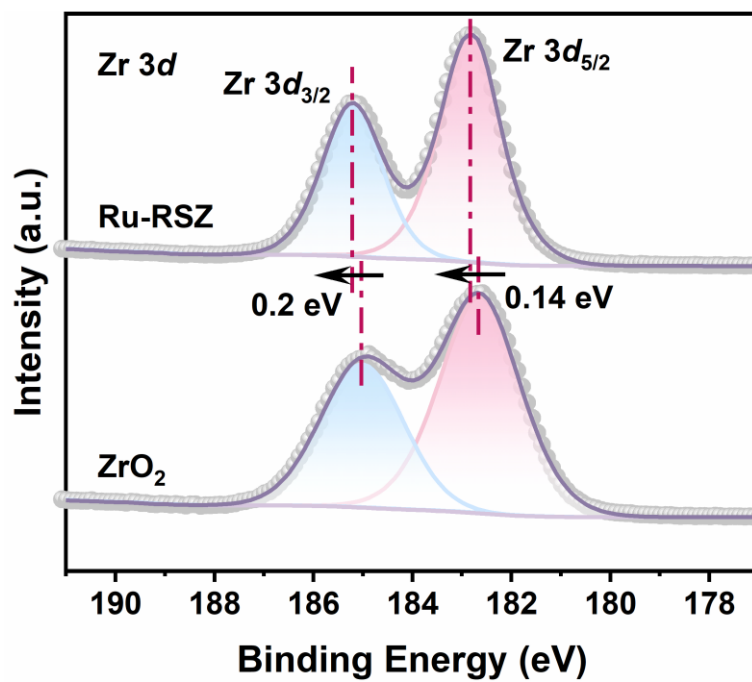

Fig. S10. XPS spectra of Ru-RSZ and ZrO<sub>2</sub> at the Zr 3d core level.

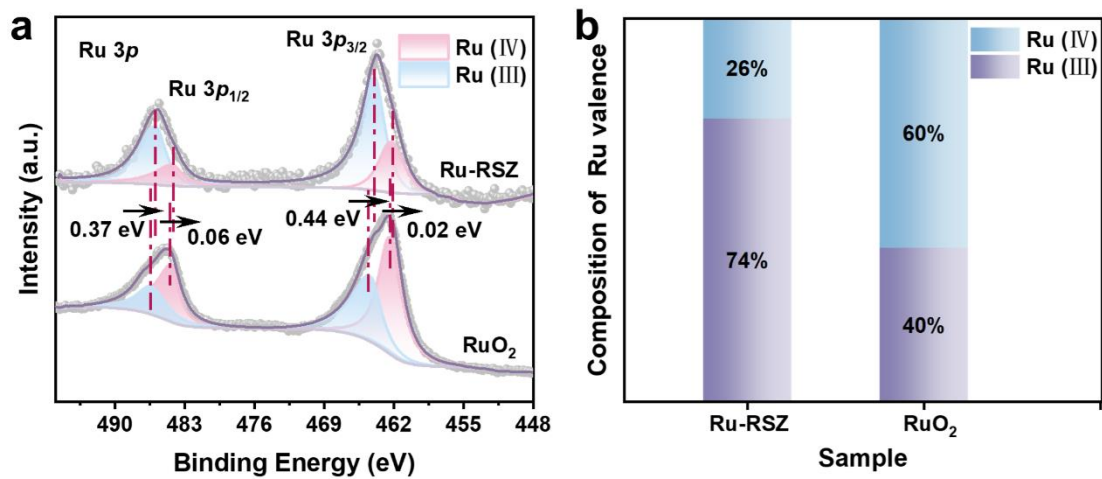

**Fig. S11.** (a) XPS spectra of Ru-RSZ and RuO<sub>2</sub> at the Ru 3p core level. (b) Corresponding compositions of Ru valence states in Ru-RSZ and RuO<sub>2</sub>.

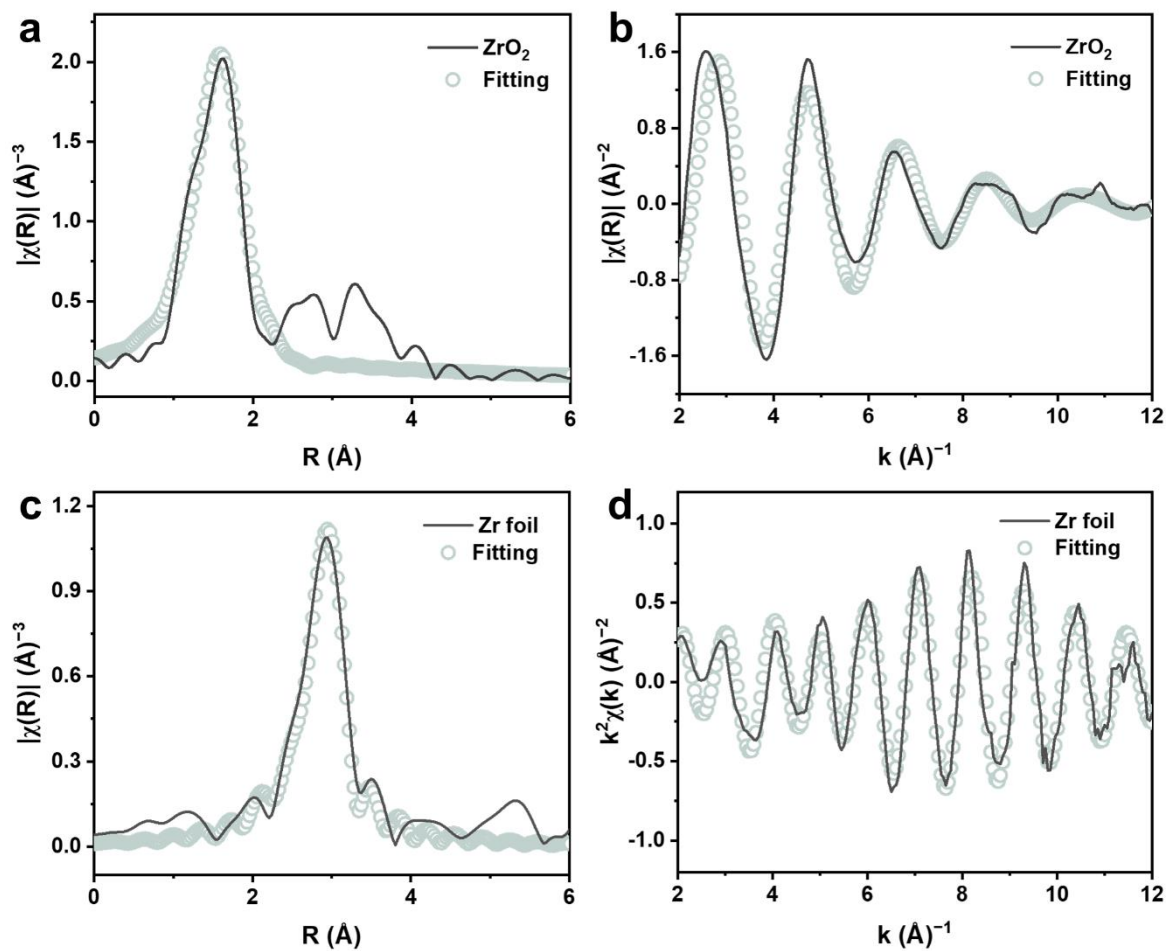

**Fig. S12.** R-space and k-space fitting results of Zr K-edge EXAFS spectra for (a, b) ZrO<sub>2</sub> and (c, d) Zr foil.

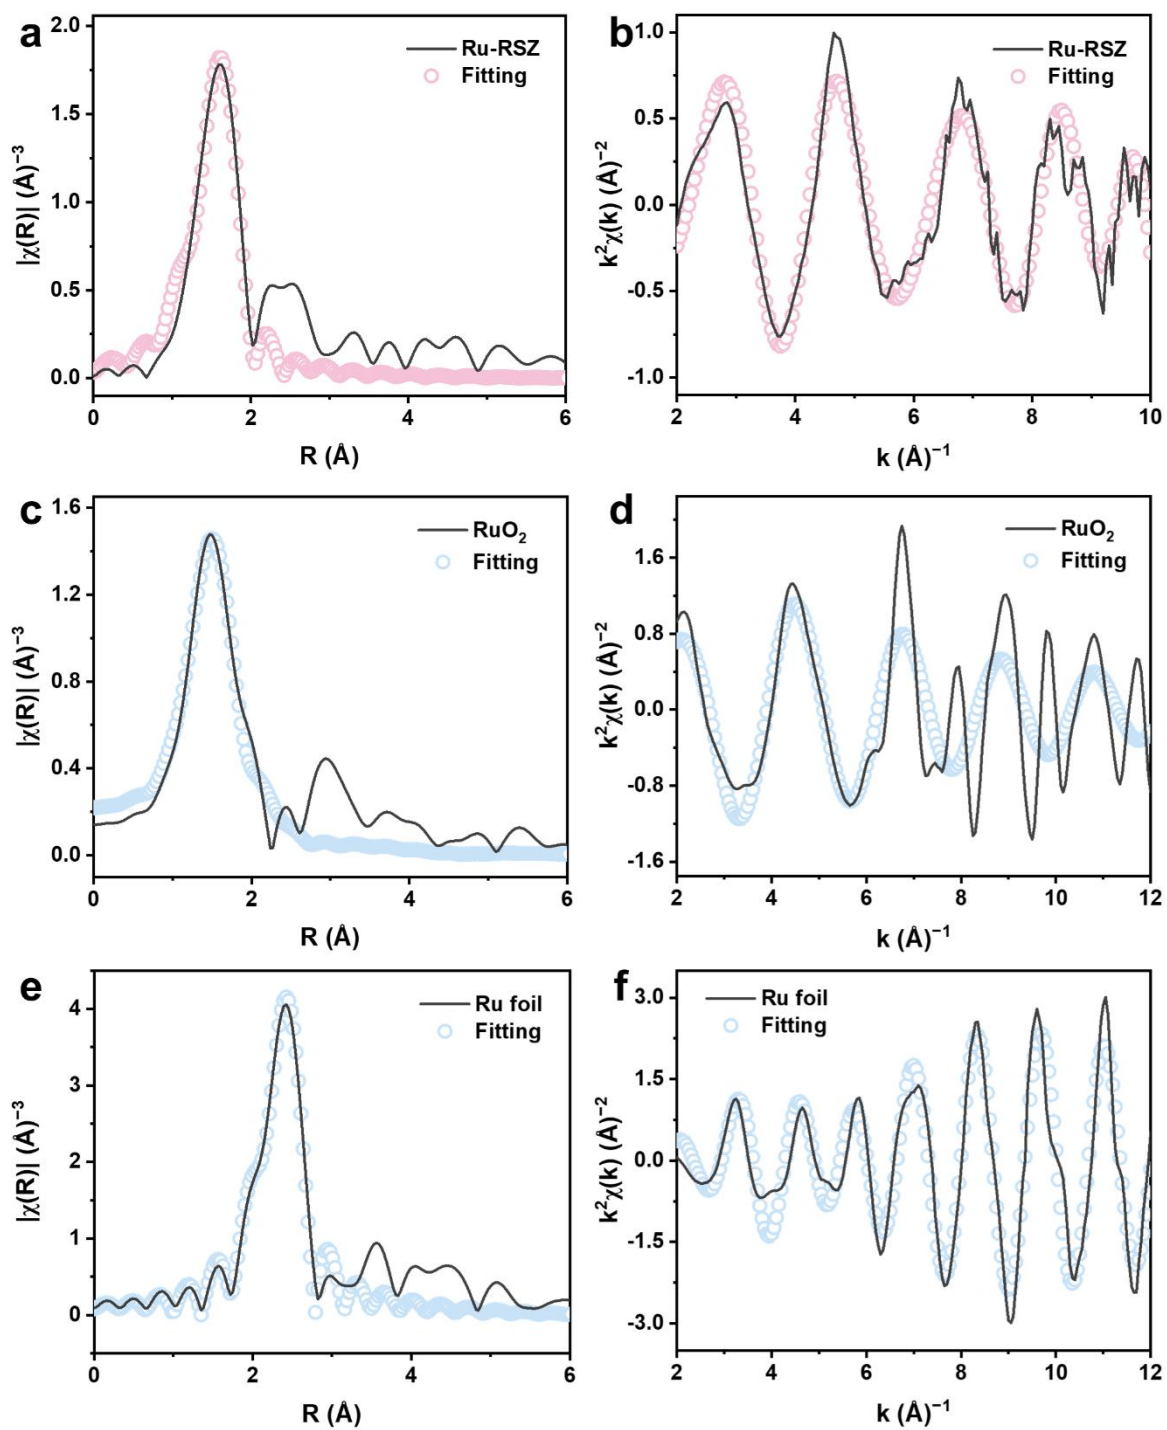

**Fig. S13.** R-space and k-space fitting results of Ru K-edge EXAFS spectra for (a, b) Ru-RSZ,

(c, d) RuO<sub>2</sub> and (e, f) Ru foil.

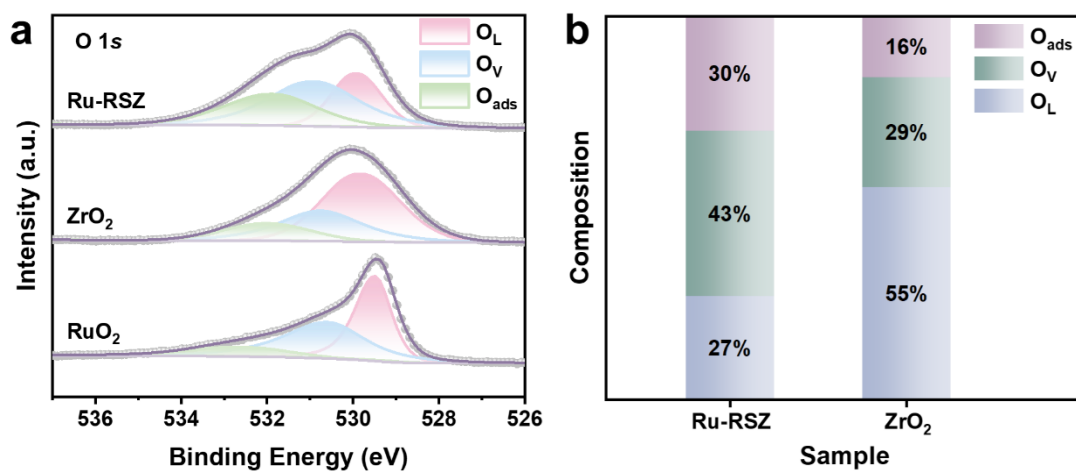

**Fig. S14.** (a) XPS spectra of Ru-RSZ, RuO<sub>2</sub> and ZrO<sub>2</sub> at the O 1s core level. (b)

Corresponding composition of O valence states in Ru-RSZ and ZrO<sub>2</sub>.

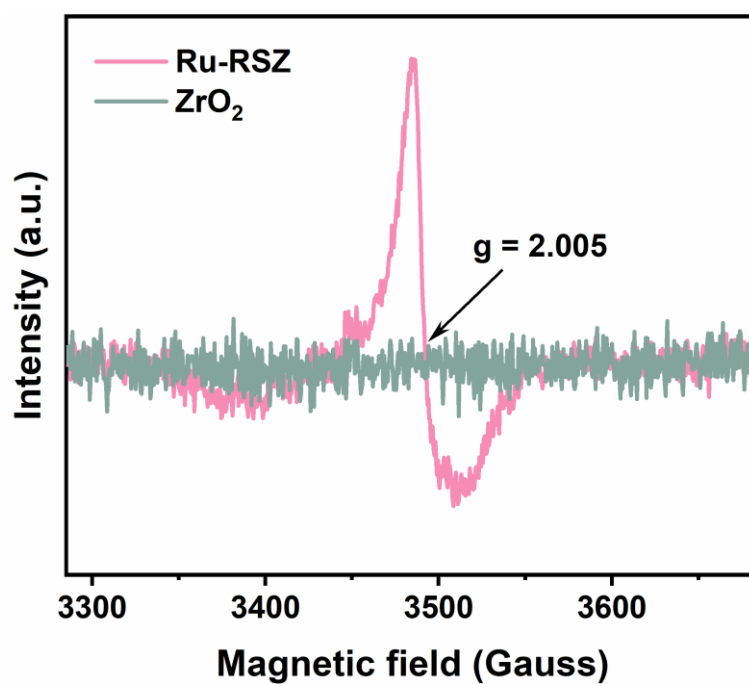

**Fig. S15.** EPR spectra of Ru-RSZ and ZrO.

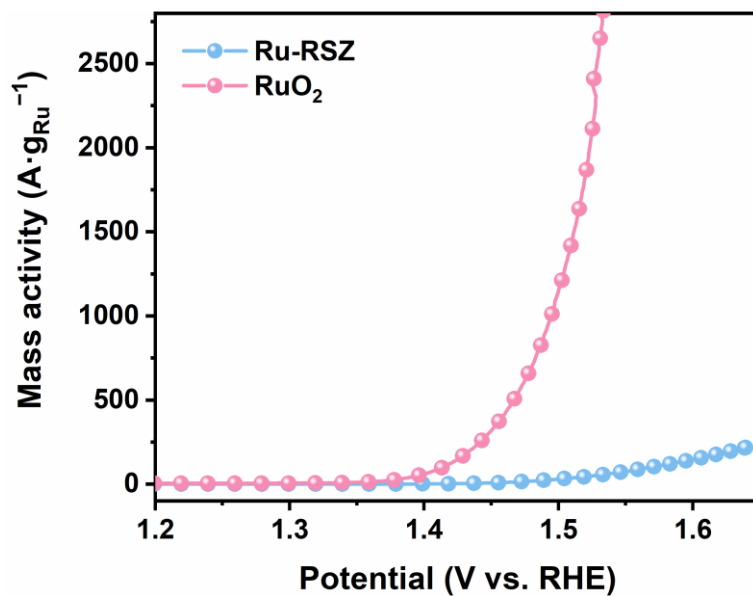

**Fig. S16.** Ru mass activities normalized of Ru-RSZ and RuO<sub>2</sub> catalysts as function of applied potential.

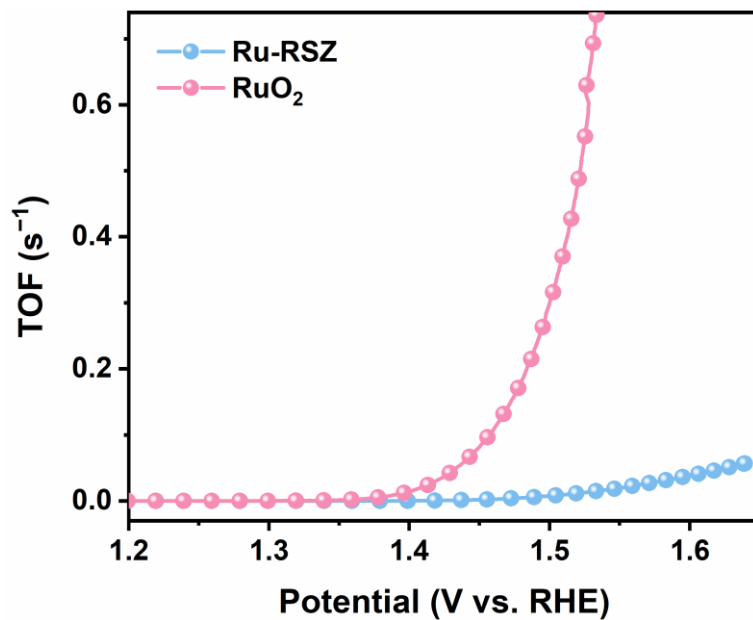

**Fig. S17.** The turnover frequency of the Ru-RSZ and RuO<sub>2</sub> catalysts calculated from polarization curves.

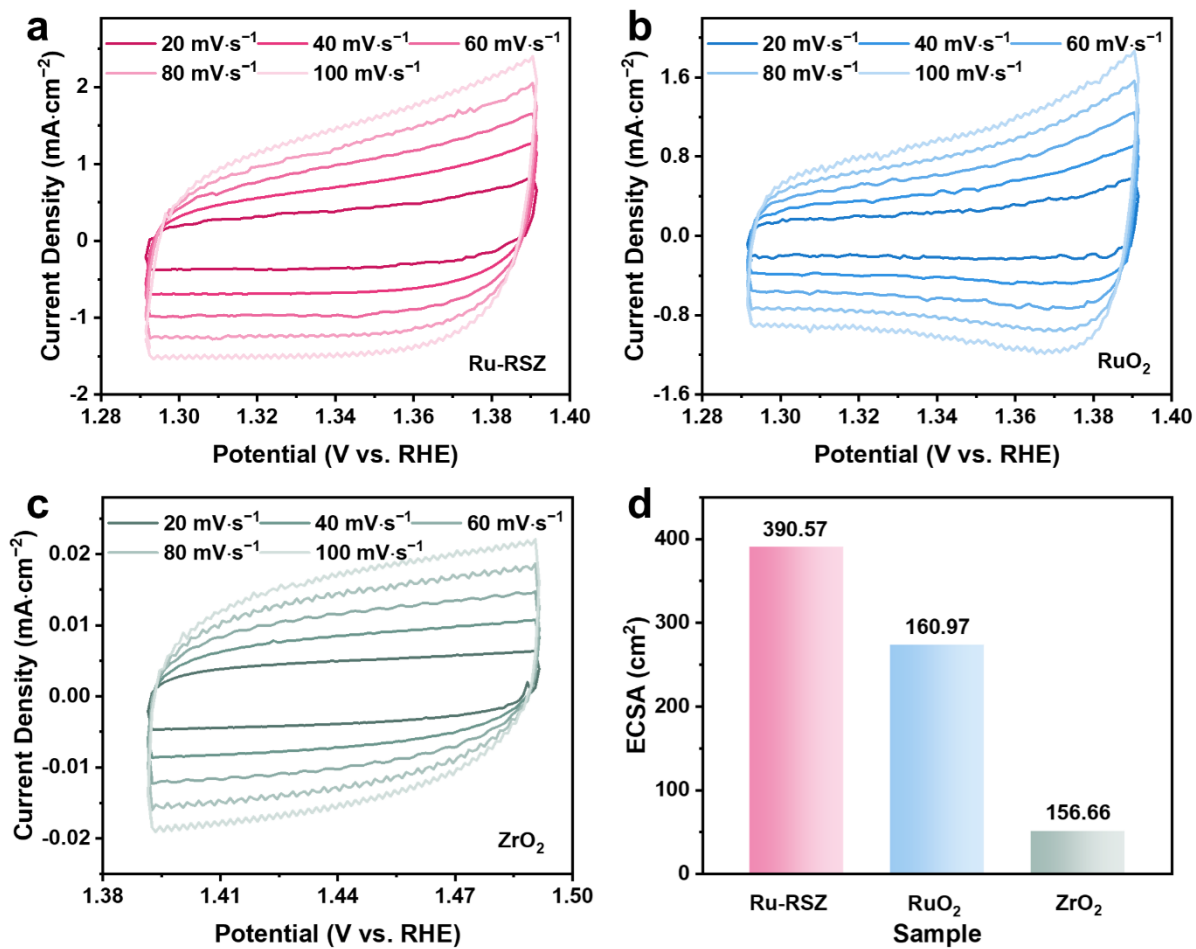

**Fig. S18.** CV curves of (a) Ru-RSZ, (b) RuO<sub>2</sub> and (c) ZrO<sub>2</sub> at non-Faradaic regions with various scan rates. (d) Comparison of ECSA values of Ru-RSZ, RuO<sub>2</sub> and ZrO<sub>2</sub>.

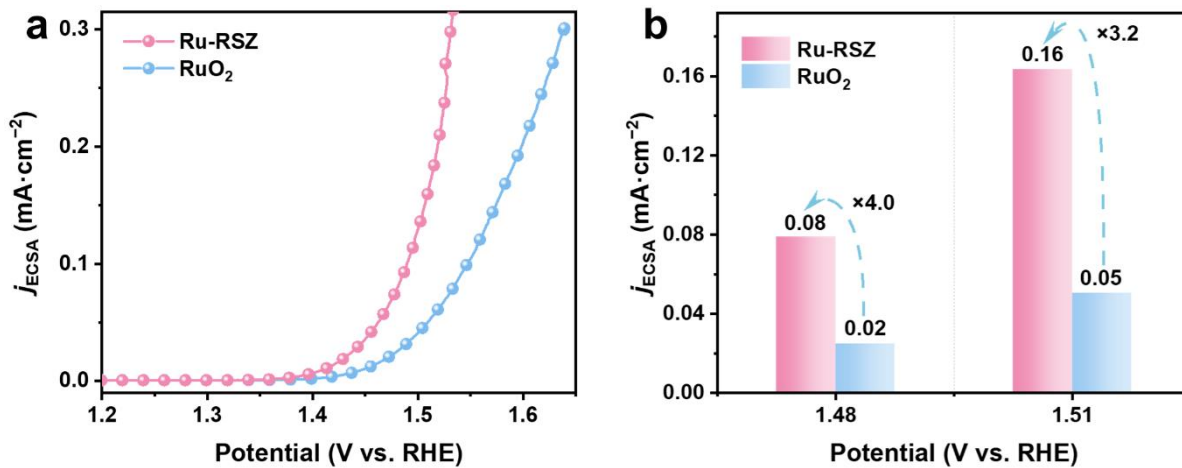

**Fig. S19.** (a) Ru ECSA-normalized activities of Ru-RSZ and RuO<sub>2</sub> catalysts. (b) ECSA normalized current densities ( $j_{ECSA}$ ) of Ru-RSZ and RuO<sub>2</sub> at 1.48 and 1.51 V vs. RHE.

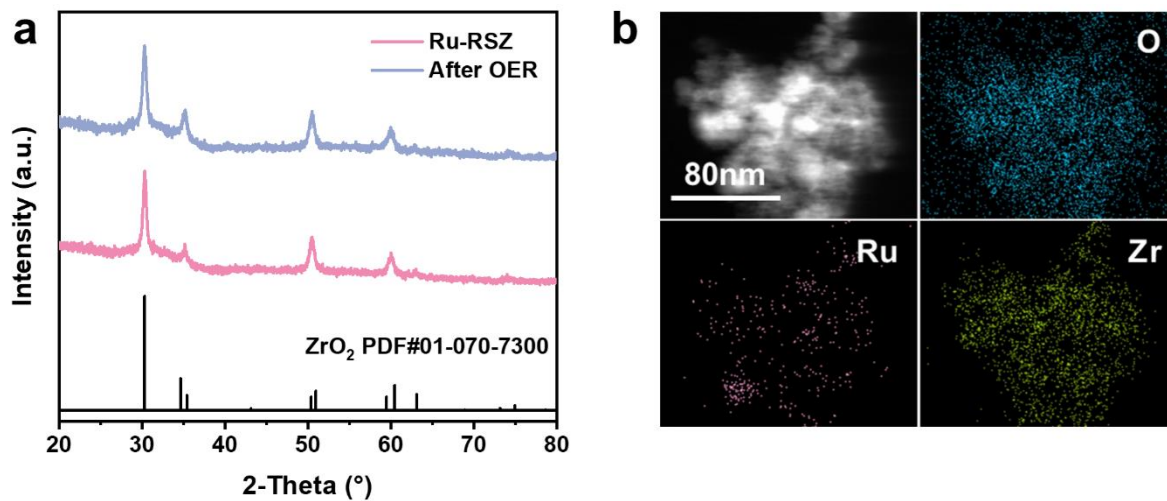

**Fig. S20.** Post-reaction (a) XRD pattern and (b) HAADF-STEM images of Ru-RSZ.

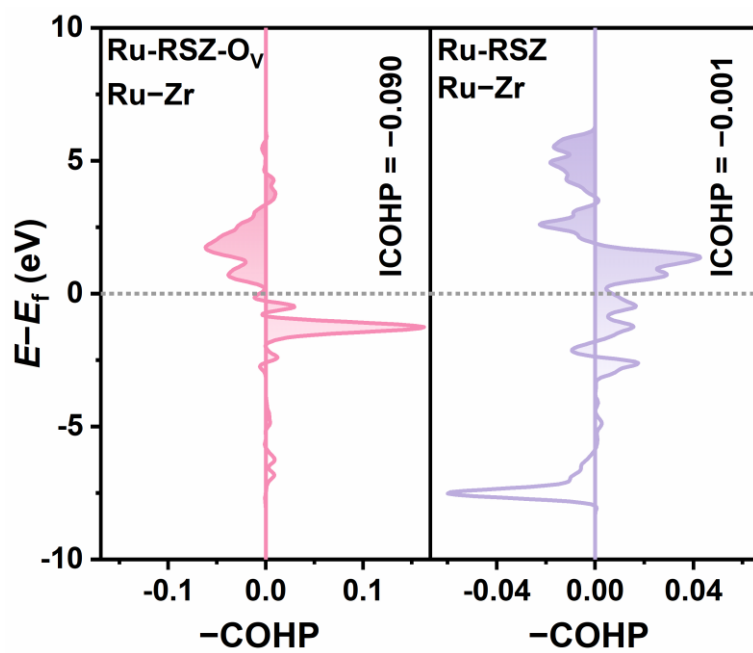

Fig. S21. Calculated COHP of Ru-RSZ-Ov and Ru-RSZ.

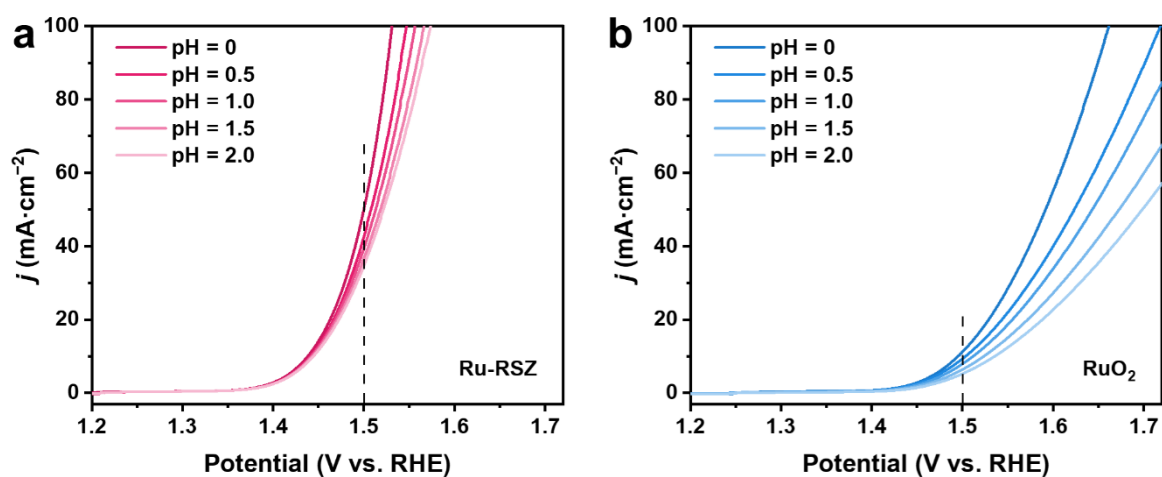

Fig. S22. LSV curves of (a) Ru-RSZ and (b) RuO<sub>2</sub> at different pH values.

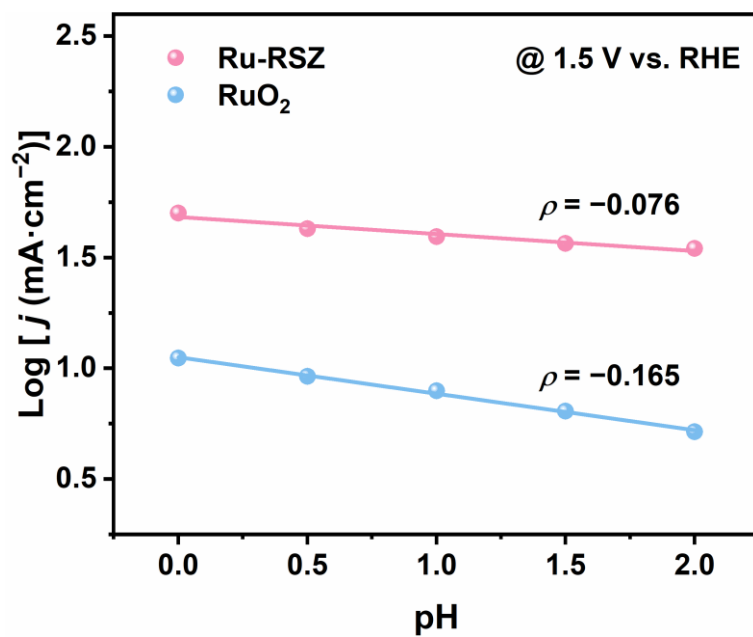

Fig. S23. pH-dependent activity of Ru-RSZ and RuO<sub>2</sub> at 1.5 V vs. RHE.

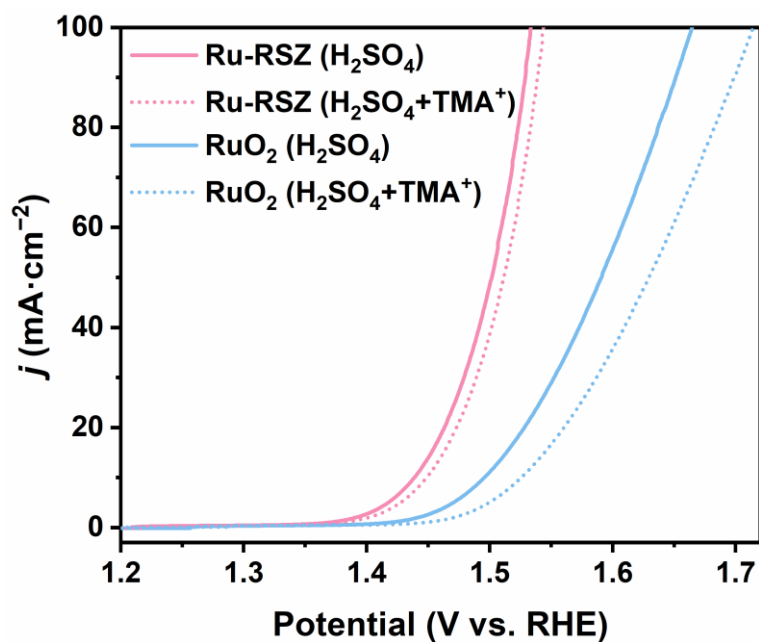

Fig. S24. LSVs with and without TMA<sup>+</sup> of Ru-RSZ and RuO<sub>2</sub> in 0.5M H<sub>2</sub>SO<sub>4</sub>.

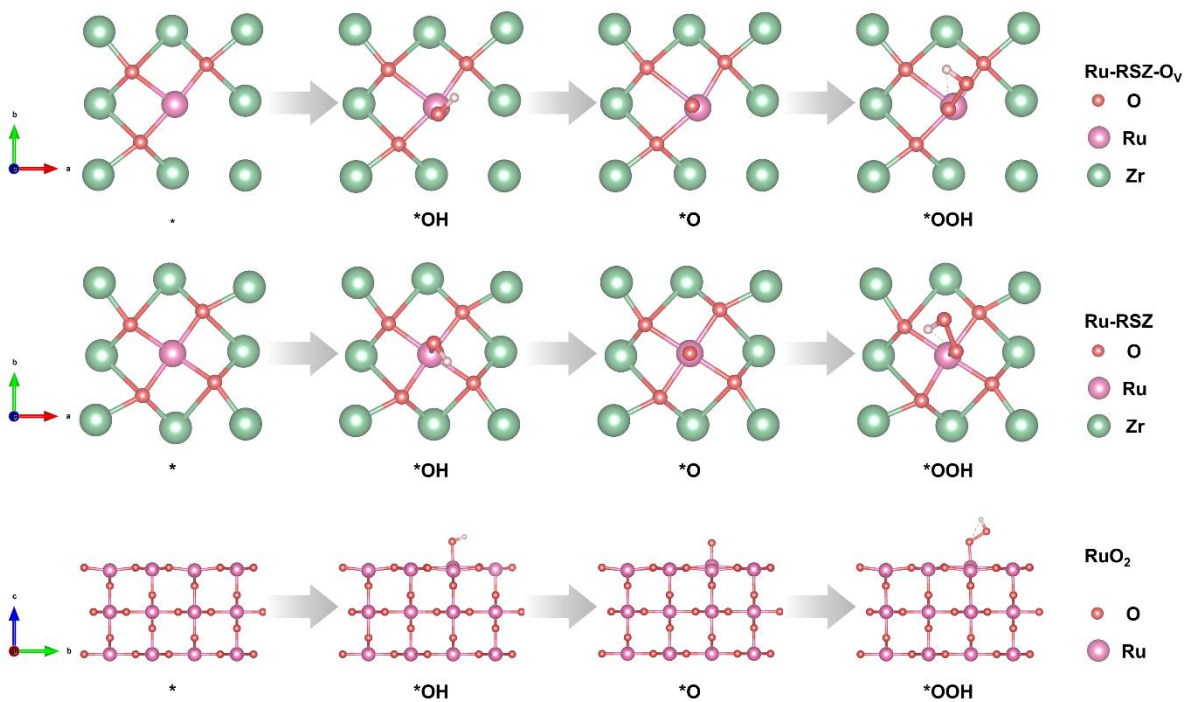

**Fig. S25.** Adsorption/desorption and electron transfer processes of OER intermediates on the surface of Ru-RSZ-O<sub>v</sub>, Ru-RSZ and RuO<sub>2</sub> for AEM.

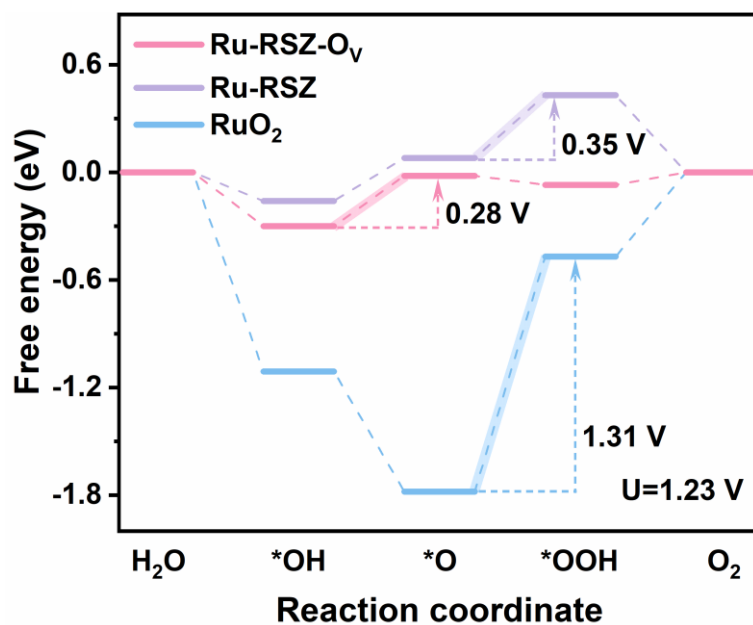

Fig. S26. Gibbs free energy diagram of Ru-RSZ- $O_v$ , Ru-RSZ and RuO<sub>2</sub> at U=1.23 V.

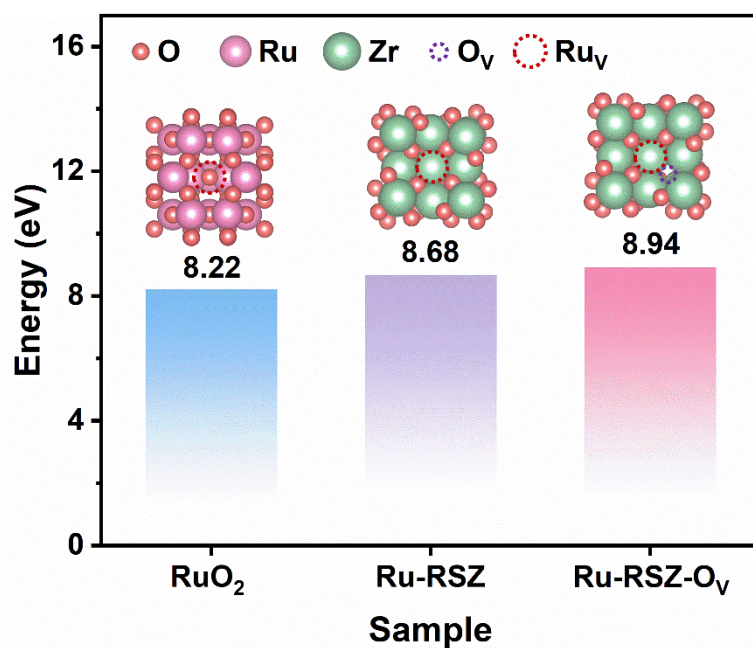

Fig. S27. Ru vacancy formation energy of Ru-RSZ- $O_v$ , Ru-RSZ and RuO<sub>2</sub>.

**Table S1.** The ratio of metallic elements in Ru-RSZ obtained by EDS

| Sample | Atomic ratio (%)    |
|--------|---------------------|
| Ru-RSZ | Ru: Zr = 10.8: 89.2 |

**Table S2.** XPS fitting analysis for the Ru 3*p* in Ru-RSZ and RuO<sub>2</sub>.

| Sample           | Peak             | Peak Position | Area      | Ratio |
|------------------|------------------|---------------|-----------|-------|
| Ru-RSZ           | Ru <sup>4+</sup> | 462.15        | 17340.21  | 0.26  |
|                  |                  | 484.14        | 9848.67   |       |
|                  | Ru <sup>3+</sup> | 463.85        | 53827.80  | 0.74  |
|                  |                  | 485.84        | 22617.19  |       |
| RuO <sub>2</sub> | Ru <sup>4+</sup> | 462.17        | 184238.48 | 0.60  |
|                  |                  | 484.20        | 99813.38  |       |
|                  | Ru <sup>3+</sup> | 464.22        | 129873.18 | 0.40  |
|                  |                  | 486.28        | 58946.26  |       |

**Table S3.** The EXAFS fitting parameters at the Zr and Ru K-edge.

| Sample           | Path              | CN <sup>a</sup> | R(Å) <sup>b</sup> | $\sigma^2$ (10 <sup>-3</sup> ) <sup>c</sup> | $\Delta E_0$ <sup>d</sup> | R factor |
|------------------|-------------------|-----------------|-------------------|---------------------------------------------|---------------------------|----------|
| Zr foil          | Zr-Zr             | 8*              | 3.21              | 0.008                                       | 4.7                       | 0.0175   |
| ZrO <sub>2</sub> | Zr-O <sub>1</sub> | 8*              | 2.07              | 0.003                                       | 9.6                       | 0.0123   |
| Ru foil          | Ru-Ru             | 12*             | 2.67              | 0.003                                       | 1.5                       | 0.0119   |
| RuO <sub>2</sub> | Ru-O              | 6*              | 1.98              | 0.004                                       | -4.5                      | 0.0070   |
| <b>Ru-RSZ</b>    | Ru-O              | 7.4             | 2.06              | 0.004                                       | 8.2                       | 0.0207   |

$S_0^2=0.876$ , (fitting from Zr foil),  $S_0^2=0.744$ , (fitting from RuO<sub>2</sub>)

<sup>a</sup>CN: coordination numbers;

<sup>b</sup>R: bond distance;

<sup>c</sup> $\sigma^2$ : Debye-Waller factors;

<sup>d</sup> $\Delta E_0$ : the inner potential correction;

R factor: goodness of fit.

**Table S4.** XPS fitting analysis for the O 1s in Ru-RSZ and RuO<sub>2</sub>.

| Sample           | Peak             | Peak Position | Area      | Ratio |
|------------------|------------------|---------------|-----------|-------|
| Ru-RSZ           | O <sub>L</sub>   | 529.81        | 123282.02 | 0.30  |
|                  | O <sub>V</sub>   | 530.78        | 198955.32 | 0.43  |
|                  | O <sub>ads</sub> | 531.76        | 137966.16 | 0.27  |
| RuO <sub>2</sub> | O <sub>L</sub>   | 529.39        | 132727.39 | 0.16  |
|                  | O <sub>V</sub>   | 530.48        | 128376.55 | 0.29  |
|                  | O <sub>ads</sub> | 532.45        | 43670.89  | 0.55  |

**Table S5.** Measured  $C_{dl}$  and corresponding ECSA values of different catalysts.

| Sample           | $C_{dl}$ (mF·cm <sup>-2</sup> ) | ECSA (cm <sup>2</sup> ) |
|------------------|---------------------------------|-------------------------|
| Ru-RSZ           | 13.67                           | 390.57                  |
| RuO <sub>2</sub> | 9.56                            | 273.14                  |
| ZrO <sub>2</sub> | 1.77                            | 50.57                   |

**Table S6.** Fitting parameters for EIS data of different catalysts.

| Sample           | $R_{sol}$ ( $\Omega$ ) | $R_T$ ( $\Omega$ ) | $C_T$ (F) | $R_{ct}$ ( $\Omega$ ) | $C_{\mu}$ (mF) | $\chi^2$ , % |
|------------------|------------------------|--------------------|-----------|-----------------------|----------------|--------------|
| Ru-RSZ           | 1.25                   | 0.30               | 0.61      | 1.16                  | 0.91           | 1.32         |
| RuO <sub>2</sub> | 1.23                   | 0.84               | 0.53      | 2.35                  | 0.93           | 2.26         |
| ZrO <sub>2</sub> | 1.30                   | 1237               | 0.80      | 2586                  | 1.29           | 1.50         |

**Table S7.** OER performance metrics of Ru-RSZ and RuO<sub>2</sub>.

| <b>Sample</b>    | <b><math>\eta@10</math></b><br><b>mV·cm<sup>-2</sup></b><br><b>(mV)</b> | <b>Tafel slope</b><br><b>(mV·dec<sup>-1</sup>)</b> | <b><math>R_{ct}</math></b><br><b>(<math>\Omega</math>)</b> | <b><math>C_{dl}</math></b><br><b>(mF·cm<sup>-2</sup>)</b> | <b>TOF</b><br><b>(s<sup>-1</sup>)</b> |
|------------------|-------------------------------------------------------------------------|----------------------------------------------------|------------------------------------------------------------|-----------------------------------------------------------|---------------------------------------|
| Ru-RSZ           | 208                                                                     | 62.15                                              | 1.16                                                       | 13.67                                                     | 0.38                                  |
| RuO <sub>2</sub> | 265                                                                     | 71.97                                              | 2.35                                                       | 9.56                                                      | 0.01                                  |

**Table S8.** Comparison of OER performance of Ru-RSZ with previously reported noble-metal-based electrocatalysts in acidic electrolyte.

| Sample                                                                      | Electrolyte                          | $\eta@10 \text{ mV}\cdot\text{cm}^{-2}$<br>(mV) | Stability<br>(h) | References |
|-----------------------------------------------------------------------------|--------------------------------------|-------------------------------------------------|------------------|------------|
| Ru-RSZ                                                                      | 0.5 M H <sub>2</sub> SO <sub>4</sub> | 208                                             | 500              | This work  |
| com-RuO <sub>2</sub>                                                        | 0.5 M H <sub>2</sub> SO <sub>4</sub> | 265                                             | 19               | This work  |
| Sb-SnO <sub>2</sub> @RuO <sub>x</sub>                                       | 0.5 M H <sub>2</sub> SO <sub>4</sub> | 295                                             | 15               | 3          |
| RuO <sub>2</sub> -WC NPs                                                    | 0.5 M H <sub>2</sub> SO <sub>4</sub> | 347                                             | 10               | 4          |
| PtCo-RuO <sub>2</sub> /C                                                    | 0.1 M HClO <sub>4</sub>              | 222                                             | 20               | 5          |
| Ru <sub>0.27</sub> Co <sub>0.73</sub> O <sub>4</sub>                        | 0.5 M H <sub>2</sub> SO <sub>4</sub> | 265                                             | 100              | 6          |
| IrRu/T <sub>90</sub> G <sub>10</sub>                                        | 0.1 M HClO <sub>4</sub>              | 254                                             | 25               | 7          |
| Ru <sub>1</sub> -Pt <sub>3</sub> Co                                         | 0.1 M HClO <sub>4</sub>              | 280                                             | 30               | 8          |
| Ga-RuO <sub>2</sub>                                                         | 0.5 M H <sub>2</sub> SO <sub>4</sub> | 217.5                                           | 150              | 9          |
| Ni-RuO <sub>2</sub>                                                         | 0.1 M HClO <sub>4</sub>              | 214                                             | 214              | 10         |
| ac-Cr <sub>0.53</sub> Ru <sub>0.47</sub> O <sub>2-<math>\delta</math></sub> | 0.1 M HClO <sub>4</sub>              | 239                                             | 40               | 11         |
| p-L-IrO <sub>2</sub>                                                        | 0.1 M HClO <sub>4</sub>              | 270                                             | 200              | 12         |
| IrO <sub>x</sub> /TiN                                                       | 0.1 M HClO <sub>4</sub>              | 293                                             | 250              | 13         |
| Sr-IrMnO <sub>2</sub> /CNTs                                                 | 0.5 M H <sub>2</sub> SO <sub>4</sub> | 236                                             | 400              | 14         |
| Pr <sub>3</sub> Ir <sub>1-x</sub> Mo <sub>x</sub> O <sub>7</sub>            | 0.1 M HClO <sub>4</sub>              | 259                                             | 200              | 15         |
| IrO <sub>2</sub> @TaB <sub>2</sub>                                          | 0.1 M HClO <sub>4</sub>              | 288                                             | 120              | 16         |
| Ti-IrO <sub>x</sub> /Ir                                                     | 0.5 M H <sub>2</sub> SO <sub>4</sub> | 254                                             | 100              | 17         |
| m-RuO <sub>2</sub>                                                          | 0.5 M H <sub>2</sub> SO <sub>4</sub> | 230                                             | 100              | 18         |

|                             |                                      |     |     |    |
|-----------------------------|--------------------------------------|-----|-----|----|
| IrRu HNWs                   | 0.5 M H <sub>2</sub> SO <sub>4</sub> | 215 | 200 | 19 |
| SS Pt-RuO <sub>2</sub> HNSs | 0.5 M H <sub>2</sub> SO <sub>4</sub> | 325 | 100 | 20 |
| ZnRuO <sub>x</sub>          | 0.5 M H <sub>2</sub> SO <sub>4</sub> | 230 | 320 | 21 |
| RuNiO <sub>x</sub>          | 0.5 M H <sub>2</sub> SO <sub>4</sub> | 217 | 100 | 22 |

**Table S9.** Bader charge of different elements.

| Sample           | Bader charge of Ru | Bader charge of Zr |
|------------------|--------------------|--------------------|
|                  | element            | element            |
| Ru-RSZ-Ov        | +0.3099  e         | +1.5131  e         |
| Ru-RSZ           | +0.8249  e         | +1.6345  e         |
| RuO <sub>2</sub> | +1.4893  e         | ——                 |
| ZrO <sub>2</sub> | ——                 | +1.2822  e         |

## References

1. C. Lin, J.-L. Li, X. Li, S. Yang, W. Luo, Y. Zhang, S.-H. Kim, D.-H. Kim, S. S. Shinde, Y.-F. Li, Z.-P. Liu, Z. Jiang and J.-H. Lee, *Nat. Catal.*, 2021, **4**, 1012-1023.
2. C. Zhou, L. Li, Z. Dong, F. Lv, H. Guo, K. Wang, M. Li, Z. Qian, N. Ye, Z. Lin, M. Luo and S. Guo, *Nat. Commun.*, 2024, **15**, 9774.
3. S. Y. Park, J. W. An, J. H. Baek, H. J. Woo, W. J. Lee, S. H. Kwon and S. Bera, *ACS Appl. Mater. Interfaces*, 2023, **15**, 15332-15343.
4. S. C. Sun, H. Jiang, Z. Y. Chen, Q. Chen, M. Y. Ma, L. Zhen, B. Song and C. Y. Xu, *Angewandte Chemie International Edition*, 2022, **61**, e202202519.
5. I. Rodríguez-García, J. L. Gómez de la Fuente, J. Torrero, D. García Sánchez, M. Abdel Salam, J. A. Alonso, A. S. Gago, K. A. Friedrich, S. Rojas, M. Retuerto and Á. Tolosana-Moranchel, *J. Power Sources*, 2024, **604**, 234416.
6. G. Wang, G. Zhang and X. Chen, *Small*, 2024, **20**, e2310372.
7. I. G. Kim, A. Lim, J. H. Jang, K.-Y. Lee, I. W. Nah and S. Park, *J. Power Sources*, 2021, **501**, 230002.
8. Y. Yao, S. Hu, W. Chen, Z.-Q. Huang, W. Wei, T. Yao, R. Liu, K. Zang, X. Wang, G. Wu, W. Yuan, T. Yuan, B. Zhu, W. Liu, Z. Li, D. He, Z. Xue, Y. Wang, X. Zheng, J. Dong, C.-R. Chang, Y. Chen, X. Hong, J. Luo, S. Wei, W.-X. Li, P. Strasser, Y. Wu and Y. Li, *Nat. Catal.*, 2019, **2**, 304-313.
9. L. Wu, W. Huang, D. Li, H. Jia, B. Zhao, J. Zhu, H. Zhou and W. Luo, *Angew. Chem.*, 2024, **137**.
10. Z. Y. Wu, F. Y. Chen, B. Li, S. W. Yu, Y. Z. Finfrock, D. M. Meira, Q. Q. Yan, P. Zhu, M. X. Chen, T. W. Song, Z. Yin, H. W. Liang, S. Zhang, G. Wang and H. Wang, *Nat. Mater.*, 2023, **22**, 100-108.
11. X. Zhao, Z. Li, H. Jang, X. Wei, L. Wang, M. G. Kim, J. Cho, X. Liu and Q. Qin, *Small*, 2024, **20**, e2311172.
12. Z. Xie, X. Liang, Z. Kang, Y. Zou, X. Wang, Y. A. Wu, G. King, Q. Liu, Y. Huang, X. Zhao, H. Chen and X. Zou, *CCS Chem.*, 2025, **7**, 216-228.
13. X. Han, T. Mou, A. Islam, S. Kang, Q. Chang, Z. Xie, X. Zhao, K. Sasaki, J. A. Rodriguez, P. Liu and J. G. Chen, *J. Am. Chem. Soc.*, 2024, **146**, 16499-16510.
14. J. Kuang, B. Deng, Z. Jiang, Y. Wang and Z. J. Jiang, *Adv. Mater.*, 2023, **36**, 2306934.
15. S. Chen, S. Zhang, L. Guo, L. Pan, C. Shi, X. Zhang, Z.-F. Huang, G. Yang and J.-J. Zou, *Nat. Commun.*, 2023, **14**, 4127.
16. Y. Wang, M. Zhang, Z. Kang, L. Shi, Y. Shen, B. Tian, Y. Zou, H. Chen and X. Zou, *Nat. Commun.*, 2023, **14**, 5119.
17. Y. Wang, R. Ma, Z. Shi, H. Wu, S. Hou, Y. Wang, C. Liu, J. Ge and W. Xing, *Chem*, 2023, **9**, 2931-2942.
18. G. Zhao, W. Guo, M. Shan, Y. Fang, G. Wang, M. Gao, Y. Liu, H. Pan and W. Sun, *Adv. Mater.*, 2024, **36**, 2404213.
19. L. Tao, F. Lv, D. Wang, H. Luo, F. Lin, H. Gong, H. Mi, S. Wang, Q. Zhang, L. Gu, M. Luo and

- S. Guo, *Joule*, 2024, **8**, 450-460.
20. J. Wang, H. Yang, F. Li, L. Li, J. Wu, S. Liu, T. Cheng, Y. Xu, Q. Shao and X. Huang, *Sci. Adv.*, 2022, **8**, eabl9271.
  21. P. Sun, Z. Qiao, X. Dong, R. Jiang, Z. T. Hu, J. Yun and D. Cao, *J. Am. Chem. Soc.*, 2024, **146**, 15515-15524.
  22. Y.-J. Ko, M. H. Han, C. Lim, S.-H. Yu, C. H. Choi, B. K. Min, J.-Y. Choi, W. H. Lee and H.-S. Oh, *J. Energy Chem.*, 2023, **77**, 54-61.
